# Supplementary material
Source: publisher figshare collection journal article supplement (https://karger.figshare.com/ndownloader/files/25671689)
Supplement: Supplementary file 1 [file 25671689]

**Supplemental Figure 1.**

Unweighted and weighted PCoA of β-diversity for all samples. According to β-diversity based on UniFrac distance, there were no differences of MAM composition between terminal ileum and sigmoid colon (Supplementary Figure 1, PERMANOVA, *p*=0.98 for unweighted and *p*=0.93 for weighted)
